# Supplementary material
Source: PubMed Central journal article supplement (PMC5469505)
Supplement: NIHMS858999-supplement-Supplement.pdf [file NIHMS858999-supplement-Supplement.pdf]

## Supplementary Online Content

Evans JR, Zhao SG, Chang SL, et al. Patient-level DNA damage and repair pathway profiles and prognosis after prostatectomy for high-risk prostate cancer. *JAMA Oncol*. Published online January 7, 2015. doi:10.1001/jamaoncol.2015.4955.

**eFigure 1.** DDR pathway expression heatmaps ordered by clinical variables.

**eFigure 2.** Metastasis-free survival predictive nomogram.

**eFigure 3.** Signature score by ethnicity.

**eTable 1.** DNA damage and repair gene sets and pathways, and correlations with clinical and molecular variables.

**eTable 2.** Cohort clinical characteristics.

**eTable 3.** Mutation frequencies of the genes in the DDR gene sets.

**eTable 4.** Comparison of the gene members of the HR genesets.

**eTable 5.** Individual DDR pathway Cox analysis.

**eTable 6.** UVA and MVA Cox analysis in the training cohort.

**eTable 7.** Cox model c-indices.

**eTable 8.** Signature risk group by ethnicity.

**eMethods.** Custom R script and files to retrieve DDR mutation information.

This supplementary material has been provided by the authors to give readers additional information about their work.

**Title: Patient-level DNA Damage and Repair Pathway Profiles Are Prognostic after Prostatectomy for High-Risk Prostate Cancer**

Evans, Zhao, et al.

**Supplemental Contents**

|                                                                                                                 |       |
|-----------------------------------------------------------------------------------------------------------------|-------|
| Supplemental Materials and Methods                                                                              | p. 2  |
| eFigure 1: DDR pathway expression heatmaps ordered by clinical variables.                                       | p. 3  |
| eFigure 2: Metastasis-free survival predictive nomogram.                                                        | p. 4  |
| eFigure 3: Signature score by ethnicity.                                                                        | p. 5  |
| eTable 1: DNA damage and repair gene sets and pathways, and correlations with clinical and molecular variables. | p. 6  |
| eTable 2: Cohort clinical characteristics.                                                                      | p. 7  |
| eTable 3: Mutation frequencies of the genes in the DDR gene sets.                                               | p.8   |
| eTable 4: Comparison of the gene members of the HR genesets.                                                    | p. 13 |
| eTable 5: Individual DDR pathway Cox analysis.                                                                  | p. 14 |
| eTable 6: UVA and MVA Cox analysis in the training cohort.                                                      | p. 19 |
| eTable 7: Cox model c-indices.                                                                                  | p.20  |
| eTable 8: Signature risk group by ethnicity.                                                                    | p.21  |
| Custom R script and files to retrieve DDR mutation information.                                                 | p. 22 |

## **Supplemental Materials and Methods**

### *DDR GSEA gene set member gene mutation analysis*

Primary non-metastatic prostate genomic profiles from published studies and The Cancer Genome Atlas unpublished data were analyzed using the R API from cBioPortal ([cbioportal.org](http://cbioportal.org)) with a custom script (Supplemental Materials), which was run on 6/5/2015 using R 3.1.2. The primary cases for the Broad/Cornell Cell 2013 and MSKCC Cancer Cell 2010 cohorts were retrieved manually from cBioPortal, and stored in the input files listed below. The DDR GSEA gene sets were retrieved manually from the GSEA mSigDB web site ([www.broadinstitute.org/gsea/msigdb/index.jsp](http://www.broadinstitute.org/gsea/msigdb/index.jsp)), and combined into the single input file below. The following genes were removed from the analysis as cBioPortal indicated they were not valid gene symbols for analysis: LOC731751, LOC389901, LOC648152, LOC651610, LOC651921, LOC652672, LOC652857, and LOC652826.

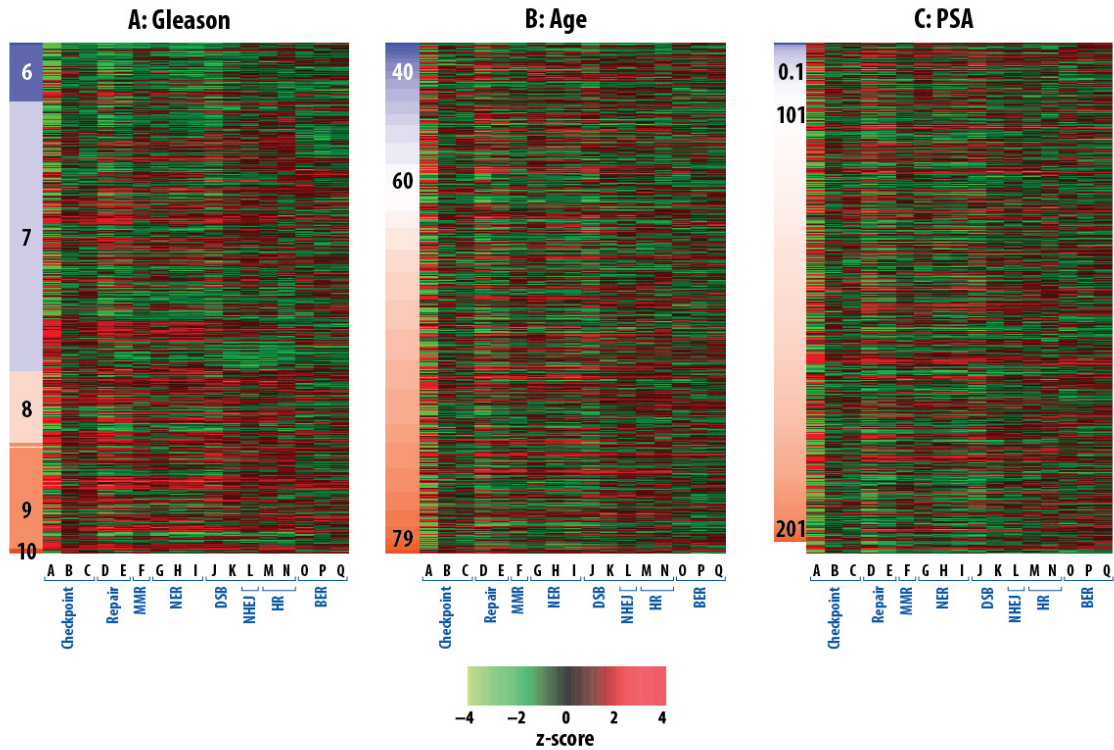

**eFigure 1:** DDR pathway expression heatmaps ordered by clinical variables Gleason (A), Age (B), and PSA (C). Color gradient sidebars at left are labeled with the maximum, average, and minimum values for each clinical variable. X-axis is labeled with DDR gene sets and pathways as described in eTable 1 in the Supplement.

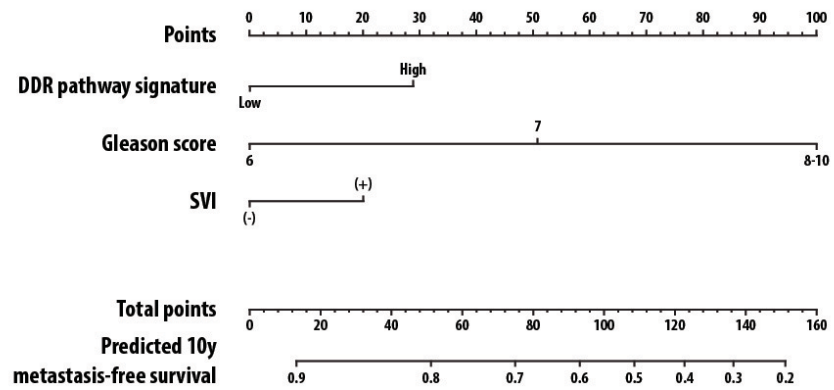

**eFigure 2:** Nomogram for predicting 10 year metastasis-free survival using the significant factors from the multivariate Cox model in the pooled validation cohorts.

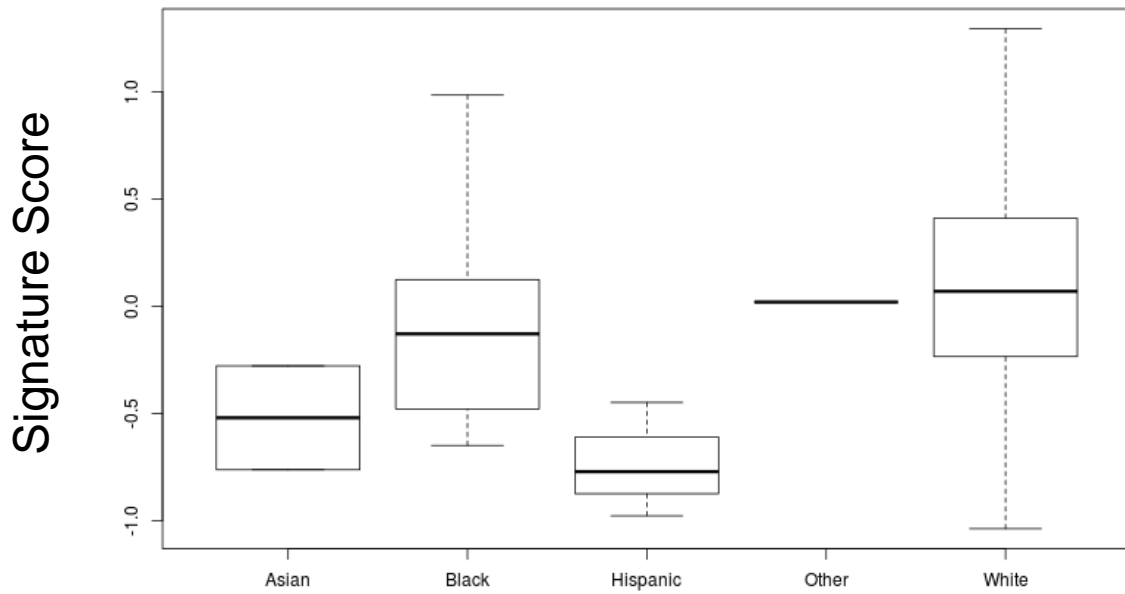

**eFigure 3: Mean DDR pathway signature score by ethnicity. n=313.**

**eTable 1:** Gene sets, heatmap positions, pathway groupings, and correlation between each DDR gene set and each clinical or molecular variable across all patients by Spearman's correlation.

| Gene Set                                                                                 | Pos. | Pathway    | Spearman's rho statistic |       |      |        |         |         | p-value  |          |          |          |          |          |
|------------------------------------------------------------------------------------------|------|------------|--------------------------|-------|------|--------|---------|---------|----------|----------|----------|----------|----------|----------|
|                                                                                          |      |            | AR                       | ARp*  | ERG  | Age    | Gleason | PSA     | ERG      | AR       | ARp*     | Age      | Gleason  | PSA      |
| REACTOME_P53_INDEPENDENT_G1_S_DNA_DAMAGE_CHECKPOINT                                      | A    | Checkpoint | 0.54                     | 0.82  | 0.21 | -0.07  | 0.09    | -0.07   | <1E-10   | <1E-10   | <1E-10   | 0.02     | 0.0023   | 0.02     |
| REACTOME_G2_M_DNA_DAMAGE_CHECKPOINT                                                      | B    | Checkpoint | 0.19                     | 0.35  | 0.03 | 0.02   | 0.14    | -0.0005 | 3.37E-01 | 7.79E-10 | <1E-10   | 0.58     | 2.06E-06 | 0.99     |
| DNA_DAMAGE_CHECKPOINT                                                                    | C    | Checkpoint | 0.46                     | 0.53  | 0.05 | -0.03  | 0.20    | 0.02    | 9.61E-02 | <1E-10   | <1E-10   | 0.33     | <1E-10   | 0.61     |
| DNA_REPAIR                                                                               | D    | Repair     | 0.48                     | 0.78  | 0.25 | -0.005 | 0.11    | -0.07   | <1E-10   | <1E-10   | <1E-10   | 0.88     | 2.14E-04 | 0.02     |
| REACTOME_DNA_REPAIR                                                                      | E    | Repair     | 0.44                     | 0.68  | 0.22 | 0.03   | 0.16    | -0.02   | <1E-10   | <1E-10   | <1E-10   | 0.35     | 1.69E-07 | 0.59     |
| KEGG_MISMATCH_REPAIR                                                                     | F    | MMR        | 0.18                     | 0.47  | 0.16 | 0.10   | 0.17    | 0.02    | 1.22E-07 | 3.17E-09 | <1E-10   | 9.49E-04 | 4.21E-08 | 0.56     |
| NUCLEOTIDE_EXCISION_REPAIR                                                               | G    | NER        | 0.31                     | 0.57  | 0.22 | -0.002 | 0.03    | -0.005  | <1E-10   | <1E-10   | <1E-10   | 0.93     | 0.26     | 0.88     |
| REACTOME_NUCLEOTIDE_EXCISION_REPAIR                                                      | H    | NER        | 0.40                     | 0.62  | 0.17 | 0.02   | 0.10    | -0.02   | 8.95E-09 | <1E-10   | <1E-10   | 0.57     | 6.48E-04 | 0.48     |
| KEGG_NUCLEOTIDE_EXCISION_REPAIR                                                          | I    | NER        | 0.41                     | 0.67  | 0.17 | 0.03   | 0.11    | -0.04   | 1.36E-08 | <1E-10   | <1E-10   | 0.38     | 3.61E-04 | 0.24     |
| DOUBLE_STRAND_BREAK_REPAIR                                                               | J    | DSB        | 0.36                     | 0.68  | 0.18 | 0.03   | 0.17    | -0.02   | 2.21E-09 | <1E-10   | <1E-10   | 0.29     | 3.85E-08 | 0.58     |
| REACTOME_DOUBLE_STRAND_BREAK_REPAIR                                                      | K    | DSB        | 0.28                     | 0.49  | 0.12 | 0.08   | 0.18    | 0.01    | 1.26E-04 | <1E-10   | <1E-10   | 0.01     | 3.03E-09 | 0.87     |
| KEGG_NON_HOMOLOGOUS_END_JOINING                                                          | L    | DSB, NHEJ  | 0.20                     | 0.37  | 0.15 | 0.08   | 0.13    | 0.01    | 3.84E-07 | <1E-10   | <1E-10   | 0.01     | 1.35E-05 | 0.79     |
| REACTOME_HOMOLOGOUS_RECOMBINATION_REPAIR_OF_REPLICATION_INDEPENDENT_DOUBLE_STRAND_BREAKS | M    | HR1, DSB   | 0.12                     | 0.27  | 0.04 | 0.12   | 0.16    | 0.03    | 1.47E-01 | 1.30E-04 | <1E-10   | 6.79E-05 | 1.50E-07 | 0.31     |
| KEGG_HOMOLOGOUS_RECOMBINATION                                                            | N    | HR2, DSB   | -0.22                    | -0.11 | 0.01 | 0.24   | 0.16    | 0.10    | 6.84E-01 | <1E-10   | 2.02E-04 | 5.73E-16 | 6.78E-08 | 8.10E-04 |
| BASE_EXCISION_REPAIR                                                                     | O    | BER        | 0.30                     | 0.33  | 0.20 | 0.06   | 0.16    | 0.01    | <1E-10   | <1E-10   | <1E-10   | 0.04     | 1.16E-07 | 0.84     |
| REACTOME_BASE_EXCISION_REPAIR                                                            | P    | BER        | 0.21                     | 0.06  | 0.10 | 0.01   | 0.11    | 0.02    | 1.39E-03 | <1E-10   | 0.040    | 0.65     | 3.05E-04 | 0.49     |

© 2015 American Medical Association. All rights reserved.

|                           |   |     |      |      |      |      |      |      |          |          |          |      |          |      |
|---------------------------|---|-----|------|------|------|------|------|------|----------|----------|----------|------|----------|------|
| KEGG_BASE_EXCISION_REPAIR | Q | BER | 0.18 | 0.11 | 0.09 | 0.02 | 0.15 | 0.05 | 1.87E-03 | 1.74E-09 | 3.87E-04 | 0.49 | 4.09E-07 | 0.11 |
|---------------------------|---|-----|------|------|------|------|------|------|----------|----------|----------|------|----------|------|

Pos.=heatmap position. MMR=Mismatch Repair. NER=Nucleotide Excision Repair. DSB=double-strand break repair. NHEJ=Non-Homologous End-Joining. HR=Homologous Recombination. BER=Base Excision Repair. ARp\*=AR pathway activity by GSEA.



| <b>eTable 2: Cohort clinical characteristics</b> |               |                                   |                                    |                                      |                                                  |
|--------------------------------------------------|---------------|-----------------------------------|------------------------------------|--------------------------------------|--------------------------------------------------|
|                                                  |               | <b>Mayo Discovery<br/>(n=545)</b> | <b>Mayo Validation<br/>(n=232)</b> | <b>Cleveland Clinic<br/>(n =183)</b> | <b>Thomas Jefferson<br/>University (n = 130)</b> |
| Age at diagnosis (Years ± SD)                    |               | 65.3 ± 6.4                        | 63.1 ± 7.4                         | 61.6 ± 6.3                           | 60.0 ± 7.0                                       |
| Follow-up (Months ± SD)                          |               | 160.7 ± 56.2                      | 80.6 ± 30.1                        | 116.6 ± 50.1                         | 103.9 ± 58.9                                     |
| Pre-operative PSA                                |               |                                   |                                    |                                      |                                                  |
|                                                  | <10           | 282 (52%)                         | 126 (54%)                          | 127 (69%)                            | 83 (64%)                                         |
|                                                  | 10 to 20      | 117 (22%)                         | 62 (27%)                           | 41 (23%)                             | 25 (19%)                                         |
|                                                  | >20           | 131 (24%)                         | 44 (19%)                           | 12 (7%)                              | 15 (11%)                                         |
|                                                  | Not available | 15 (3%)                           | 0 (0%)                             | 3 (1%)                               | 7 (5%)                                           |
| Gleason score                                    |               |                                   |                                    |                                      |                                                  |
|                                                  | 6             | 60 (11%)                          | 17 (7%)                            | 25 (17%)                             | 17 (13%)                                         |
|                                                  | 7             | 271 (49%)                         | 117 (50%)                          | 113 (62%)                            | 74 (57%)                                         |
|                                                  | 8             | 68 (13%)                          | 39 (17%)                           | 23 (13%)                             | 22 (17%)                                         |
|                                                  | 9             | 134 (24%)                         | 57 (25%)                           | 22 (12%)                             | 13 (10%)                                         |
|                                                  | 10            | 9 (2%)                            | 1 (1%)                             | 0 (0%)                               | 2 (1.5%)                                         |
|                                                  | Not available | 3 (1%)                            | 1 (1%)                             | 0 (0%)                               | 2 (1.5%)                                         |
| Tumor stage                                      |               |                                   |                                    |                                      |                                                  |
|                                                  | I             | 0 (0%)                            | 0 (0%)                             | 0 (0%)                               | 0 (0%)                                           |
|                                                  | II            | 219 (40%)                         | 97 (42%)                           | 0 (0%)                               | 10 (8%)                                          |
|                                                  | III           | 253 (46%)                         | 102 (44%)                          | 0 (0%)                               | 113 (87%)                                        |
|                                                  | IV            | 0 (0%)                            | 0 (0%)                             | 0 (0%)                               | 7 (5%)                                           |
|                                                  | Not available | 73 (13%)                          | 33 (14%)                           | 183 (100%)                           | 0 (0%)                                           |
| Extracapsular extension                          |               |                                   |                                    |                                      |                                                  |
|                                                  | Negative      | 272 (50%)                         | 136 (59%)                          | 51 (28%)                             | 23 (18%)                                         |
|                                                  | Positive      | 273 (50%)                         | 96 (41%)                           | 132 (72%)                            | 106 (81%)                                        |
|                                                  | Not available | 0 (0%)                            | 0 (0%)                             | 0 (0%)                               | 1 (1%)                                           |
| Seminal vesicle invasion                         |               |                                   |                                    |                                      |                                                  |
|                                                  | Negative      | 369 (68%)                         | 149 (64%)                          | 152 (83%)                            | 82 (63%)                                         |
|                                                  | Positive      | 176 (32%)                         | 83 (36%)                           | 31 (17%)                             | 48 (37%)                                         |
| Lymph node invasion                              |               |                                   |                                    |                                      |                                                  |
|                                                  | Negative      | 472 (87%)                         | 199 (86%)                          | 183 (100%)                           | 128 (98%)                                        |
|                                                  | Positive      | 73 (13%)                          | 33 (14%)                           | 0 (0%)                               | 2 (2%)                                           |
| Surgical margin status                           |               |                                   |                                    |                                      |                                                  |
|                                                  | Negative      | 279 (51%)                         | 99 (43%)                           | 92 (50%)                             | 31 (24%)                                         |
|                                                  | Positive      | 266 (49%)                         | 133 (57%)                          | 91 (50%)                             | 99 (76%)                                         |
| Metastatic progression                           |               |                                   |                                    |                                      |                                                  |
|                                                  | No            | 333 (61%)                         | 157 (68%)                          | 134 (73%)                            | 120 (92%)                                        |
|                                                  | Yes           | 212 (39%)                         | 75 (32%)                           | 49 (27%)                             | 10 (8%)                                          |

| <b>eTable 3: Mutation frequencies of the genes in the DDR gene sets</b>                                                                                                                                                                                        |        |       |         |        |        |        |        |          |          |        |        |        |
|----------------------------------------------------------------------------------------------------------------------------------------------------------------------------------------------------------------------------------------------------------------|--------|-------|---------|--------|--------|--------|--------|----------|----------|--------|--------|--------|
| The mutation frequencies in percent (%) for each gene in each of the GSEA DDR gene sets used was extracted from cBioPortal using a custom R script for the cBioPortal R-API as described in detail in the Supplemental Material and Methods in the Supplement. |        |       |         |        |        |        |        |          |          |        |        |        |
| <b>BASE_EXCISION_REPAIR</b>                                                                                                                                                                                                                                    |        |       |         |        |        |        |        |          |          |        |        |        |
| MSH6                                                                                                                                                                                                                                                           | MSH3   | MSH2  | POLG    | TP53   | MPG    | ERCC6  | OGG1   | HMGB1P10 | HMGB1    | HMGB2  | UNG    | SMUG1  |
| 0.5                                                                                                                                                                                                                                                            | 0.8    | 0.2   | 0.3     | 6.8    | 0.2    | 0.8    | 0.2    | 0.0      | 0.0      | 0.0    | 0.0    | 0.0    |
| TDG                                                                                                                                                                                                                                                            | NTHL1  | CCNO  | APEX1   |        |        |        |        |          |          |        |        |        |
| 0.0                                                                                                                                                                                                                                                            | 0.0    | 0.0   | 0.0     |        |        |        |        |          |          |        |        |        |
| <b>DNA_DAMAGE_CHECKPOINT</b>                                                                                                                                                                                                                                   |        |       |         |        |        |        |        |          |          |        |        |        |
| NBN                                                                                                                                                                                                                                                            | HUS1   | RINT1 | PML     | CHEK2  | BRSK1  | FOXN3  | NAE1   | PCBP4    | ATRIP    | RAD17  | ZAK    | RAD9A  |
| 0.3                                                                                                                                                                                                                                                            | 0.2    | 0.2   | 0.2     | 0.8    | 0.6    | 0.2    | 0.2    | 0.3      | 0.2      | 0.2    | 0.0    | 0.0    |
| CCNA2                                                                                                                                                                                                                                                          | CHEK1  | ATR   | NEK11   | RAD1   | TRIAP1 | GML    |        |          |          |        |        |        |
| 0.0                                                                                                                                                                                                                                                            | 0.0    | 0.0   | 0.0     | 0.0    | 0.0    | 0.0    |        |          |          |        |        |        |
| <b>DNA_REPAIR</b>                                                                                                                                                                                                                                              |        |       |         |        |        |        |        |          |          |        |        |        |
| MMS19                                                                                                                                                                                                                                                          | XRCC6  | SETX  | IGHMBP2 | MUTYH  | RAD21  | POLL   | POLI   | POLG     | LIG1     | POLE   | LIG3   | LIG4   |
| 0.2                                                                                                                                                                                                                                                            | 0.5    | 0.6   | 0.3     | 0.2    | 0.2    | 0.2    | 0.6    | 0.3      | 0.8      | 0.8    | 0.2    | 0.3    |
| HUS1                                                                                                                                                                                                                                                           | XAB2   | POLQ  | RECQL4  | RECQL5 | BRCA2  | RAD54L | ATM    | BRCA1    | VCP      | POLD1  | RAD54B | ABL1   |
| 0.2                                                                                                                                                                                                                                                            | 0.2    | 0.6   | 0.6     | 0.2    | 1.6    | 0.2    | 3.0    | 0.6      | 0.3      | 0.2    | 0.5    | 0.5    |
| FANCC                                                                                                                                                                                                                                                          | REV1   | TP53  | PRKCG   | RAD52  | RAD51  | RECQL  | XPC    | RUVBL2   | WRNIP1   | POLA1  | RPA1   | SUMO1  |
| 0.2                                                                                                                                                                                                                                                            | 0.5    | 6.8   | 0.2     | 0.3    | 0.2    | 0.2    | 0.6    | 0.3      | 0.2      | 0.3    | 0.2    | 0.2    |
| MSH6                                                                                                                                                                                                                                                           | UPF1   | MSH3  | MSH2    | MSH5   | ATRX   | MPG    | ATXN3  | CSNK1E   | ALKBH1   | OGG1   | XRCC4  | RAD51C |
| 0.5                                                                                                                                                                                                                                                            | 0.5    | 0.8   | 0.2     | 0.2    | 0.6    | 0.2    | 0.2    | 0.2      | 0.3      | 0.2    | 0.0    | 0.0    |
| POLH                                                                                                                                                                                                                                                           | RAD9A  | RAD1  | HMGB1   | RAD23B | HMGB2  | BLM    | MRE11A | UBE2V1   | UBE2V2   | POLE2  | RAD51B | NTHL1  |
| 0.0                                                                                                                                                                                                                                                            | 0.0    | 0.0   | 0.0     | 0.0    | 0.0    | 0.0    | 0.0    | 0.0      | 0.0      | 0.0    | 0.0    | 0.0    |
| SMC1A                                                                                                                                                                                                                                                          | PMS2P1 | CCNO  | UBE2A   | DDB1   | GTF2H4 | APTX   | UBE2B  | RAD50    | XRCC6BP1 | GTF2H1 | RBBP8  | UBE2N  |
| 0.0                                                                                                                                                                                                                                                            | 0.0    | 0.0   | 0.0     | 0.0    | 0.0    | 0.0    | 0.0    | 0.0      | 0.0      | 0.0    | 0.0    | 0.0    |
| SMUG1                                                                                                                                                                                                                                                          | ERCC8  | APEX1 | ERCC1   | EXO1   | CEBPG  | TNP1   | SOD1   | TP73     | MNAT1    | CSNK1D | KAT5   | PNKP   |

© 2015 American Medical Association. All rights reserved.

|                                      |       |       |         |       |        |         |        |          |        |          |        |       |
|--------------------------------------|-------|-------|---------|-------|--------|---------|--------|----------|--------|----------|--------|-------|
| 0.0                                  | 0.0   | 0.0   | 0.0     | 0.0   | 0.0    | 0.0     | 0.0    | 0.0      | 0.0    | 0.0      | 0.2    | 0.2   |
| RFC3                                 | RPA1N | RAD17 | RAD23A  | PARP1 | NBN    | UVRAG   | MLH1   | FANCG    | FANCA  | ERCC5    | ERCC6  | ERCC3 |
| 0.2                                  | 0.2   | 0.2   | 0.2     | 0.3   | 0.3    | 0.2     | 0.2    | 0.2      | 0.5    | 0.3      | 0.8    | 0.3   |
| ERCC4                                | FEN1  | ERCC2 | XRCC3   | XRCC2 | CDKN2D | PMS2    | PMS1   | CIB1     | ASF1A  | HMGB1P10 | TREX2  | ATR   |
| 0.2                                  | 0.2   | 0.5   | 0.0     | 0.0   | 0.0    | 0.0     | 0.0    | 0.0      | 0.0    | 0.0      | 0.0    | 0.0   |
| TDG                                  | PARP3 | BTG2  | GADD45G | DDB2  | NHEJ1  | GADD45A | UNG    |          |        |          |        |       |
| 0.0                                  | 0.0   | 0.0   | 0.0     | 0.0   | 0.0    | 0.0     | 0.0    |          |        |          |        |       |
|                                      |       |       |         |       |        |         |        |          |        |          |        |       |
| <b>DOUBLE_STRAND_BREAK_REPAIR</b>    |       |       |         |       |        |         |        |          |        |          |        |       |
| NBN                                  | XRCC6 | POLA1 | LIG4    | RAD52 | KAT5   | BRCA1   | RAD51  | SETX     | RAD21  | VCP      | RAD54B | ERCC4 |
| 0.3                                  | 0.5   | 0.3   | 0.3     | 0.3   | 0.2    | 0.6     | 0.2    | 0.6      | 0.2    | 0.3      | 0.5    | 0.2   |
| XRCC6BP1                             | UBE2N | NHEJ1 | CIB1    | FEN1  | XRCC4  | MRE11A  | UBE2V2 | SOD1     | RAD50  |          |        |       |
| 0.0                                  | 0.0   | 0.0   | 0.0     | 0.2   | 0.0    | 0.0     | 0.0    | 0.0      | 0.0    |          |        |       |
|                                      |       |       |         |       |        |         |        |          |        |          |        |       |
| <b>KEGG_BASE_EXCISION_REPAIR</b>     |       |       |         |       |        |         |        |          |        |          |        |       |
| MPG                                  | XRCC1 | MBD4  | OGG1    | POLD3 | PARP4  | PARP2   | POLB   | POLL     | POLD1  | POLE     | NEIL3  | APEX2 |
| 0.2                                  | 0.2   | 0.2   | 0.2     | 0.2   | 0.3    | 0.2     | 0.2    | 0.2      | 0.2    | 0.8      | 0.2    | 0.2   |
| SMUG1                                | POLE4 | HMGB1 | POLE3   | POLD4 | UNG    | PCNA    | NEIL1  | POLE2    | PARP3  | APEX1    | POLD2  | TDG   |
| 0.0                                  | 0.0   | 0.0   | 0.0     | 0.0   | 0.0    | 0.0     | 0.0    | 0.0      | 0.0    | 0.0      | 0.0    | 0.0   |
| LIG3                                 | FEN1  | LIG1  | MUTYH   | PARP1 | NEIL2  | HMGB1P1 | NTHL1  | HMGB1P40 |        |          |        |       |
| 0.2                                  | 0.2   | 0.8   | 0.2     | 0.3   | 0.0    | 0.0     | 0.0    | 0.0      |        |          |        |       |
|                                      |       |       |         |       |        |         |        |          |        |          |        |       |
| <b>KEGG_HOMOLOGOUS_RECOMBINATION</b> |       |       |         |       |        |         |        |          |        |          |        |       |
| RAD54L                               | NBN   | RAD52 | RAD51D  | RPA1  | RAD51  | POLD3   | RPA2   | RPA4     | BRCA2  | POLD1    | MUS81  | TOP3A |
| 0.2                                  | 0.3   | 0.3   | 0.2     | 0.2   | 0.2    | 0.2     | 0.2    | 0.3      | 1.6    | 0.2      | 0.2    | 0.3   |
| POLD4                                | BLM   | EME1  | RAD50   | RPA3  | RAD51C | MRE11A  | POLD2  | SSBP1    | RAD54B | SHFM1    | TOP3B  | XRCC3 |
| 0.0                                  | 0.0   | 0.0   | 0.0     | 0.0   | 0.0    | 0.0     | 0.0    | 0.0      | 0.5    | 0.2      | 0.3    | 0.0   |
| RAD51B                               | XRCC2 |       |         |       |        |         |        |          |        |          |        |       |
| 0.0                                  | 0.0   |       |         |       |        |         |        |          |        |          |        |       |
|                                      |       |       |         |       |        |         |        |          |        |          |        |       |
| <b>KEGG_MISMATCH_REPAIR</b>          |       |       |         |       |        |         |        |          |        |          |        |       |
| MLH3                                 | POLD1 | MLH1  | RFC1    | MSH2  | RFC3   | RFC2    | MSH3   | LIG1     | RPA1   | MSH6     | POLD3  | RPA2  |
| 0.6                                  | 0.2   | 0.2   | 0.3     | 0.2   | 0.2    | 0.2     | 0.8    | 0.8      | 0.2    | 0.5      | 0.2    | 0.2   |

© 2015 American Medical Association. All rights reserved.

|                                        |        |        |       |       |        |        |       |         |        |        |           |       |
|----------------------------------------|--------|--------|-------|-------|--------|--------|-------|---------|--------|--------|-----------|-------|
| RPA3                                   | PCNA   | SSBP1  | EXO1  | RPA4  | POLD2  | POLD4  | PMS2  | RFC4    | RFC5   |        |           |       |
| 0.0                                    | 0.0    | 0.0    | 0.0   | 0.3   | 0.0    | 0.0    | 0.0   | 0.0     | 0.0    |        |           |       |
| <b>KEGG_NON_HOMOLOGOUS_END_JOINING</b> |        |        |       |       |        |        |       |         |        |        |           |       |
| POLL                                   | POLM   | LIG4   | FEN1  | DNTT  | XRCC5  | XRCC6  | PRKDC | DCLRE1C | XRCC4  | MRE11A | LOC731751 | NHEJ1 |
| 0.2                                    | 0.2    | 0.3    | 0.2   | 0.3   | 0.3    | 0.5    | 1.4   | 0.3     | 0.0    | 0.0    | 0.0       | 0.0   |
| RAD50                                  |        |        |       |       |        |        |       |         |        |        |           |       |
| 0.0                                    |        |        |       |       |        |        |       |         |        |        |           |       |
| <b>KEGG_NUCLEOTIDE_EXCISION_REPAIR</b> |        |        |       |       |        |        |       |         |        |        |           |       |
| ERCC4                                  | ERCC3  | ERCC6  | ERCC5 | ERCC2 | CETN2  | RPA1   | POLD3 | RPA2    | RAD23A | RPA4   | POLD1     | POLE  |
| 0.2                                    | 0.3    | 0.8    | 0.3   | 0.5   | 0.2    | 0.2    | 0.2   | 0.2     | 0.2    | 0.3    | 0.2       | 0.8   |
| CUL4A                                  | CCNH   | GTF2H3 | MNAT1 | POLE4 | POLE3  | GTF2H5 | POLD4 | RFC4    | RFC5   | RAD23B | RBX1      | DDB2  |
| 0.2                                    | 0.2    | 0.2    | 0.0   | 0.0   | 0.0    | 0.0    | 0.0   | 0.0     | 0.0    | 0.0    | 0.0       | 0.0   |
| GTF2H2                                 | GTF2H1 | CDK7   | CUL4B | ERCC8 | GTF2H4 | RFC1   | RFC3  | RFC2    | XPC    | XPA    | LIG1      | RPA3  |
| 0.0                                    | 0.0    | 0.0    | 0.0   | 0.0   | 0.0    | 0.3    | 0.2   | 0.2     | 0.6    | 0.5    | 0.8       | 0.0   |
| PCNA                                   | DDB1   | POLE2  | ERCC1 | POLD2 |        |        |       |         |        |        |           |       |
| 0.0                                    | 0.0    | 0.0    | 0.0   | 0.0   |        |        |       |         |        |        |           |       |
| <b>NUCLEOTIDE_EXCISION_REPAIR</b>      |        |        |       |       |        |        |       |         |        |        |           |       |
| POLL                                   | MMS19  | RAD23A | TP53  | BRCA2 | LIG4   | XAB2   | ATXN3 | ERCC5   | ERCC6  | XPC    | ERCC3     | ERCC4 |
| 0.2                                    | 0.2    | 0.2    | 6.8   | 1.6   | 0.3    | 0.2    | 0.2   | 0.3     | 0.8    | 0.6    | 0.3       | 0.2   |
| ERCC1                                  | ERCC2  | RAD23B | DDB1  | ERCC8 | DDB2   | NTHL1  |       |         |        |        |           |       |
| 0.0                                    | 0.5    | 0.0    | 0.0   | 0.0   | 0.0    | 0.0    |       |         |        |        |           |       |
| <b>REACTOME_BASE_EXCISION_REPAIR</b>   |        |        |       |       |        |        |       |         |        |        |           |       |
| POLD3                                  | FEN1   | LIG1   | LIG3  | MPG   | MUTYH  | OGG1   | POLB  | POLD1   | XRCC1  | MBD4   | CCNO      | SMUG1 |
| 0.2                                    | 0.2    | 0.8    | 0.2   | 0.2   | 0.2    | 0.2    | 0.2   | 0.2     | 0.2    | 0.2    | 0.0       | 0.0   |
| APEX1                                  | NTHL1  | PCNA   | POLD2 | POLD4 | TDG    |        |       |         |        |        |           |       |
| 0.0                                    | 0.0    | 0.0    | 0.0   | 0.0   | 0.0    |        |       |         |        |        |           |       |
| <b>REACTOME_DNA_REPAIR</b>             |        |        |       |       |        |        |       |         |        |        |           |       |
| MAD2L2                                 | POLD3  | ALKBH2 | ERCC2 | ERCC3 | ERCC4  | ERCC5  | ERCC6 | FANCA   | FANCC  | FANCD2 | FANCB     | FANCF |

© 2015 American Medical Association. All rights reserved.

|                                                                                                 |           |          |           |        |           |           |           |           |           |           |           |         |
|-------------------------------------------------------------------------------------------------|-----------|----------|-----------|--------|-----------|-----------|-----------|-----------|-----------|-----------|-----------|---------|
| 0.2                                                                                             | 0.2       | 0.3      | 0.5       | 0.3    | 0.2       | 0.3       | 0.8       | 0.5       | 0.2       | 0.2       | 0.3       | 0.2     |
| LIG3                                                                                            | LIG4      | MPG      | MUTYH     | NBN    | ATM       | OGG1      | REV1      | POLB      | POLD1     | POLE      | POLR2A    | POLR2B  |
| 0.2                                                                                             | 0.3       | 0.2      | 0.2       | 0.3    | 3.0       | 0.2       | 0.5       | 0.2       | 0.2       | 0.8       | 0.5       | 0.5     |
| RAD52                                                                                           | REV3L     | RFC2     | RFC3      | RPA1   | RPA2      | RPS27A    | BRCA1     | BRCA2     | TCEA1     | TP53BP1   | USP1      | XPA     |
| 0.3                                                                                             | 0.3       | 0.2      | 0.2       | 0.2    | 0.2       | 0.3       | 0.6       | 1.6       | 0.2       | 1.1       | 0.3       | 0.5     |
| MBD4                                                                                            | CCNH      | C19orf40 | MDC1      | RAD50  | CDK7      | CCNO      | ERCC8     | DDB1      | DDB2      | ERCC1     | FANCE     | ALKBH3  |
| 0.2                                                                                             | 0.2       | 0.2      | 0.6       | 0.0    | 0.0       | 0.0       | 0.0       | 0.0       | 0.0       | 0.0       | 0.0       | 0.0     |
| APEX1                                                                                           | LOC389901 | MGMT     | MNAT1     | MRE11A | NTHL1     | PCNA      | POLD2     | POLE2     | POLH      | POLR2C    | POLR2D    | POLR2E  |
| 0.0                                                                                             | 0.0       | 0.0      | 0.0       | 0.0    | 0.0       | 0.0       | 0.0       | 0.0       | 0.0       | 0.0       | 0.0       | 0.0     |
| ATR                                                                                             | FANCL     | POLD4    | RAD23B    | RFC4   | RFC5      | RPA3      | LOC648152 | LOC651610 | LOC651921 | LOC652672 | LOC652857 | GTF2H2B |
| 0.0                                                                                             | 0.0       | 0.0      | 0.0       | 0.0    | 0.0       | 0.0       | 0.0       | 0.0       | 0.0       | 0.0       | 0.0       | 0.0     |
| FANCG                                                                                           | FEN1      | XRCC6    | ZBTB32    | GTF2H3 | LIG1      | POLR2K    | TDP1      | PRKDC     | XAB2      | FANCM     | RAD51     | XPC     |
| 0.2                                                                                             | 0.2       | 0.5      | 0.5       | 0.2    | 0.8       | 0.2       | 0.2       | 1.4       | 0.2       | 0.3       | 0.2       | 0.6     |
| XRCC1                                                                                           | XRCC5     | PALB2    | C17orf70  | BRIP1  | SMUG1     | UBE2T     | GTF2H1    | GTF2H2    | GTF2H4    | H2AFX     | POLR2F    | POLR2G  |
| 0.2                                                                                             | 0.3       | 0.6      | 0.3       | 0.2    | 0.0       | 0.0       | 0.0       | 0.0       | 0.0       | 0.0       | 0.0       | 0.0     |
| POLR2H                                                                                          | POLR2I    | POLR2J   | POLR2L    | TDG    | RPS27AP11 | UBA52     | XRCC4     |           |           |           |           |         |
| 0.0                                                                                             | 0.0       | 0.0      | 0.0       | 0.0    | 0.0       | 0.0       | 0.0       |           |           |           |           |         |
|                                                                                                 |           |          |           |        |           |           |           |           |           |           |           |         |
| <b>REACTOME_DOUBLE_STRAND_BREAK_REPAIR</b>                                                      |           |          |           |        |           |           |           |           |           |           |           |         |
| XRCC6                                                                                           | LIG1      | LIG4     | NBN       | ATM    | TDP1      | PRKDC     | RAD51     | RAD52     | RPA1      | RPA2      | BRCA1     | BRCA2   |
| 0.5                                                                                             | 0.8       | 0.3      | 0.3       | 3.0    | 0.2       | 1.4       | 0.2       | 0.3       | 0.2       | 0.2       | 0.6       | 1.6     |
| LOC389901                                                                                       | MRE11A    | RPA3     | LOC651610 | XRCC4  | TP53BP1   | XRCC5     | BRIP1     | MDC1      | RAD50     | H2AFX     |           |         |
| 0.0                                                                                             | 0.0       | 0.0      | 0.0       | 0.0    | 1.1       | 0.3       | 0.2       | 0.6       | 0.0       | 0.0       |           |         |
|                                                                                                 |           |          |           |        |           |           |           |           |           |           |           |         |
| <b>REACTOME_G2_M_DNA_DAMAGE_CHECKPOINT</b>                                                      |           |          |           |        |           |           |           |           |           |           |           |         |
| CHEK2                                                                                           | ATM       | WEE1     | ATRIP     | CHEK1  | ATR       | LOC648152 | LOC651610 | LOC651921 | CCNB1     | CDK1      | CDC25C    |         |
| 0.8                                                                                             | 3.0       | 0.2      | 0.2       | 0.0    | 0.0       | 0.0       | 0.0       | 0.0       | 0.0       | 0.0       | 0.0       |         |
|                                                                                                 |           |          |           |        |           |           |           |           |           |           |           |         |
| <b>REACTOME_HOMOLOGOUS_RECOMBINATION_REPAIR_OF_REPLICATION_INDEPENDENT_DOUBLE_STRAND_BREAKS</b> |           |          |           |        |           |           |           |           |           |           |           |         |
| LIG1                                                                                            | NBN       | ATM      | RAD51     | RAD52  | RPA1      | RPA2      | BRCA1     | BRCA2     | TP53BP1   | BRIP1     | MDC1      | RAD50   |
| 0.8                                                                                             | 0.3       | 3.0      | 0.2       | 0.3    | 0.2       | 0.2       | 0.6       | 1.6       | 1.1       | 0.2       | 0.6       | 0.0     |
| H2AFX                                                                                           | MRE11A    | RPA3     | LOC651610 |        |           |           |           |           |           |           |           |         |
| 0.0                                                                                             | 0.0       | 0.0      | 0.0       |        |           |           |           |           |           |           |           |         |

© 2015 American Medical Association. All rights reserved.

|                                                            |        |        |        |        |        |        |        |        |           |           |           |         |  |
|------------------------------------------------------------|--------|--------|--------|--------|--------|--------|--------|--------|-----------|-----------|-----------|---------|--|
|                                                            |        |        |        |        |        |        |        |        |           |           |           |         |  |
| <b>REACTOME_NUCLEOTIDE_EXCISION_REPAIR</b>                 |        |        |        |        |        |        |        |        |           |           |           |         |  |
| POLD3                                                      | ERCC2  | ERCC3  | ERCC4  | ERCC5  | ERCC6  | GTF2H3 | LIG1   | POLD1  | POLE      | POLR2A    | POLR2B    | POLR2K  |  |
| 0.2                                                        | 0.5    | 0.3    | 0.2    | 0.3    | 0.8    | 0.2    | 0.8    | 0.2    | 0.8       | 0.5       | 0.5       | 0.2     |  |
| XPA                                                        | XPC    | CCNH   | CDK7   | ERCC8  | DDB1   | DDB2   | ERCC1  | GTF2H1 | GTF2H2    | GTF2H4    | MNAT1     | PCNA    |  |
| 0.5                                                        | 0.6    | 0.2    | 0.0    | 0.0    | 0.0    | 0.0    | 0.0    | 0.0    | 0.0       | 0.0       | 0.0       | 0.0     |  |
| POLR2G                                                     | POLR2H | POLR2I | POLR2J | POLR2L | POLD4  | RAD23B | RFC4   | RFC5   | RPA3      | LOC652672 | LOC652857 | GTF2H2B |  |
| 0.0                                                        | 0.0    | 0.0    | 0.0    | 0.0    | 0.0    | 0.0    | 0.0    | 0.0    | 0.0       | 0.0       | 0.0       | 0.0     |  |
| XAB2                                                       | RFC2   | RFC3   | RPA1   | RPA2   | TCEA1  | POLD2  | POLE2  | POLR2C | POLR2D    | POLR2E    | POLR2F    |         |  |
| 0.2                                                        | 0.2    | 0.2    | 0.2    | 0.2    | 0.2    | 0.0    | 0.0    | 0.0    | 0.0       | 0.0       | 0.0       |         |  |
|                                                            |        |        |        |        |        |        |        |        |           |           |           |         |  |
| <b>REACTOME_P53_INDEPENDENT_G1_S_DNA_DAMAGE_CHECKPOINT</b> |        |        |        |        |        |        |        |        |           |           |           |         |  |
| PSMD14                                                     | CHEK2  | PSMA8  | PSME4  | ATM    | PSMA1  | PSMA2  | PSMA6  | PSMB4  | PSMB5     | PSMB6     | PSMC5     | PSMC6   |  |
| 0.2                                                        | 0.8    | 0.3    | 0.2    | 3.0    | 0.2    | 0.2    | 0.2    | 0.2    | 0.2       | 0.2       | 0.2       | 0.3     |  |
| PSME2                                                      | RPS27A | PSMF1  | PSMD6  | CDC25A | CHEK1  | PSMA3  | PSMA4  | PSMA5  | PSMA7     | PSMB1     | PSMB2     | PSMB3   |  |
| 0.2                                                        | 0.3    | 0.2    | 0.2    | 0.3    | 0.0    | 0.0    | 0.0    | 0.0    | 0.0       | 0.0       | 0.0       | 0.0     |  |
| PSMC3                                                      | PSMC4  | PSMD7  | PSMD8  | PSMD9  | PSMD10 | PSMD11 | PSMD12 | PSMD13 | LOC651610 | LOC652826 | RPS27AP11 | UBA52   |  |
| 0.0                                                        | 0.0    | 0.0    | 0.0    | 0.0    | 0.0    | 0.0    | 0.0    | 0.0    | 0.0       | 0.0       | 0.0       | 0.0     |  |
| PSMD1                                                      | PSMD2  | PSMD3  | PSMD4  | PSMD5  | PSME1  | PSMB7  | PSMB8  | PSMB9  | PSMB10    | PSMC1     | PSMC2     |         |  |
| 0.2                                                        | 0.3    | 0.3    | 0.2    | 0.2    | 0.2    | 0.0    | 0.0    | 0.0    | 0.0       | 0.0       | 0.0       |         |  |

**eTable 4:** Comparison of the gene members of the HR gene sets

| <b>REACTOME_HOMOLOGOUS_RECOMBINATION_REPAIR_OF_REPLICATION_INDEPENDENT_DOUBLE_STRAND_BREAKS (M)</b> | <b>Common</b> | <b>KEGG_HOMOLOGOUS_RECOMBINATION (N)</b> |
|-----------------------------------------------------------------------------------------------------|---------------|------------------------------------------|
| ATM                                                                                                 | BRCA2         | BLM                                      |
| BRCA1                                                                                               | MRE11A        | EME1                                     |
| BRIP1                                                                                               | NBN           | MUS81                                    |
| H2AFX                                                                                               | RAD50         | POLD1                                    |
| LIG1                                                                                                | RAD51         | POLD2                                    |
| LOC651610                                                                                           | RAD52         | POLD3                                    |
| MDC1                                                                                                | RPA1          | POLD4                                    |
| TP53BP1                                                                                             | RPA2          | RAD51B                                   |
|                                                                                                     | RPA3          | RAD51C                                   |
|                                                                                                     |               | RAD51D                                   |
|                                                                                                     |               | RAD54B                                   |
|                                                                                                     |               | RAD54L                                   |
|                                                                                                     |               | RPA4                                     |
|                                                                                                     |               | SHFM1                                    |
|                                                                                                     |               | SSBP1                                    |
|                                                                                                     |               | TOP3A                                    |
|                                                                                                     |               | TOP3B                                    |
|                                                                                                     |               | XRCC2                                    |
|                                                                                                     |               | XRCC3                                    |

**eTable 5:** Univariate and multivariate Cox analysis of individual DDR pathways and metastasis-free survival in the training cohort

| <b>Checkpoint</b>                                                                                                                                        |                       |                    |                |
|----------------------------------------------------------------------------------------------------------------------------------------------------------|-----------------------|--------------------|----------------|
|                                                                                                                                                          |                       | <b>HR (95% CI)</b> | <b>P Value</b> |
| UVA                                                                                                                                                      |                       | 1.44 (1.28-1.61)   | 1.18E-09       |
| MVA                                                                                                                                                      |                       |                    |                |
| Pathway                                                                                                                                                  |                       | 1.24 (1.09-1.40)   | 0.00067        |
| Age                                                                                                                                                      |                       | 1.00 (0.97-1.02)   | 0.815          |
| PSA                                                                                                                                                      |                       |                    |                |
|                                                                                                                                                          | <10 (Low Risk)        | 1 [Reference]      |                |
|                                                                                                                                                          | 10-20 (Int. Risk)     | 0.81 (0.56-1.17)   | 0.25           |
|                                                                                                                                                          | >20 (High Risk)       | 0.81 (0.56-1.17)   | 0.26           |
| Gleason                                                                                                                                                  |                       |                    |                |
|                                                                                                                                                          | ≤6 (Low Risk)         | 1 [Reference]      |                |
|                                                                                                                                                          | 7 (Int. Risk)         | 2.42 (1.04-5.62)   | 0.039          |
|                                                                                                                                                          | 8-10 (High Risk)      | 6.59 (2.83-15.33)  | 1.23E-05       |
| SMS (+ vs. -)                                                                                                                                            |                       | 1.03 (0.78-1.38)   | 0.82           |
| SVI                                                                                                                                                      |                       | 1.45 (1.04-2.02)   | 0.028          |
| ECE                                                                                                                                                      |                       | 1.13 (0.83-1.55)   | 0.42           |
| LNI                                                                                                                                                      |                       | 1.10 (0.75-1.61)   | 0.63           |
| UVA=univariate. MVA=multivariate. PSA=prostate specific antigen. SMS=surgical margin status. SVI=seminal vesicle invasion. ECE=extra-capsular extension. |                       |                    |                |
| <b>Repair</b>                                                                                                                                            |                       |                    |                |
|                                                                                                                                                          |                       | <b>HR (95% CI)</b> | <b>P Value</b> |
| UVA                                                                                                                                                      |                       | 1.25 (1.13-1.38)   | 1.25E-05       |
| MVA                                                                                                                                                      |                       |                    |                |
| Pathway                                                                                                                                                  |                       | 1.13 (1.02-1.26)   | 0.018          |
| Age                                                                                                                                                      |                       | 1.00 (0.98-1.02)   | 0.89           |
| PSA                                                                                                                                                      |                       |                    |                |
|                                                                                                                                                          | <10 (Low Risk) (Ref.) | 1 [Reference]      |                |
|                                                                                                                                                          | 10-20 (Int. Risk)     | 0.81 (0.56-1.16)   | 0.25           |
|                                                                                                                                                          | >20 (High Risk)       | 0.83 (0.57-1.19)   | 0.31           |
| Gleason                                                                                                                                                  |                       |                    |                |
|                                                                                                                                                          | ≤6 (Low Risk) (Ref.)  | 1 [Reference]      |                |
|                                                                                                                                                          | 7 (Int. Risk)         | 2.50 (1.08-5.79)   | 0.033          |
|                                                                                                                                                          | 8-10 (High Risk)      | 6.93 (2.98-16.10)  | 6.81E-06       |
| SMS (+ vs. -)                                                                                                                                            |                       | 1.03 (0.77-1.37)   | 0.84           |
| SVI                                                                                                                                                      |                       | 1.46 (1.05-2.03)   | 0.024          |
| ECE                                                                                                                                                      |                       | 1.12 (0.82-1.53)   | 0.46           |



|                |                   |  |                    |                |
|----------------|-------------------|--|--------------------|----------------|
|                | LNI               |  | 1.17 (0.81-1.71)   | 0.40           |
|                |                   |  |                    |                |
|                |                   |  |                    |                |
| <b>MMR</b>     |                   |  |                    |                |
|                |                   |  | <b>HR (95% CI)</b> | <b>P Value</b> |
| UVA            |                   |  | 1.23 (1.09-1.40)   | 7.77E-04       |
| MVA            |                   |  |                    |                |
|                | Pathway           |  | 1.13 (0.99-1.28)   | 0.061          |
|                | Age               |  | 1.00 (0.98-1.02)   | 0.87           |
|                | PSA               |  |                    |                |
|                | <10 (Low Risk)    |  | 1 [Reference]      |                |
|                | 10-20 (Int. Risk) |  | 0.78 (0.54-1.13)   | 0.18           |
|                | >20 (High Risk)   |  | 0.81 (0.57-1.17)   | 0.27           |
| <b>Gleason</b> |                   |  |                    |                |
|                | ≤6 (Low Risk)     |  | 1 [Reference]      |                |
|                | 7 (Int. Risk)     |  | 2.57 (1.11-5.95)   | 0.028          |
|                | 8-10 (High Risk)  |  | 7.17 (3.09-16.62)  | 4.42E-06       |
|                | SMS (+ vs. -)     |  | 1.03 (0.77-1.37)   | 0.84           |
|                | SVI               |  | 1.50 (1.08-2.08)   | 0.016          |
|                | ECE               |  | 1.14 (0.83-1.55)   | 0.42           |
|                | LNI               |  | 1.18 (0.81-1.72)   | 0.38           |
|                |                   |  |                    |                |
|                |                   |  |                    |                |
| <b>NER</b>     |                   |  |                    |                |
|                |                   |  | <b>HR (95% CI)</b> | <b>P Value</b> |
| UVA            |                   |  | 1.27 (1.12-1.45)   | 2.11E-04       |
| MVA            |                   |  |                    |                |
|                | Pathway           |  | 1.15 (1.01-1.32)   | 0.041          |
|                | Age               |  | 1.00 (0.98-1.02)   | 0.88           |
|                | PSA               |  |                    |                |
|                | <10 (Low Risk)    |  | 1 [Reference]      |                |
|                | 10-20 (Int. Risk) |  | 0.79 (0.55-1.13)   | 0.20           |
|                | >20 (High Risk)   |  | 0.82 (0.57-1.18)   | 0.29           |
| <b>Gleason</b> |                   |  |                    |                |
|                | ≤6 (Low Risk)     |  | 1 [Reference]      |                |
|                | 7 (Int. Risk)     |  | 2.54 (1.10-5.88)   | 0.030          |
|                | 8-10 (High Risk)  |  | 7.17 (3.09-16.62)  | 4.45E-06       |
|                | SMS (+ vs. -)     |  | 1.04 (0.78-1.38)   | 0.80           |
|                | SVI               |  | 1.48 (1.07-2.06)   | 0.019          |
|                | ECE               |  | 1.12 (0.82-1.53)   | 0.46           |
|                | LNI               |  | 1.15 (0.79-1.68)   | 0.47           |
|                |                   |  |                    |                |
|                |                   |  |                    |                |
|                |                   |  |                    |                |
|                |                   |  |                    |                |

|                       |                   |                    |                |
|-----------------------|-------------------|--------------------|----------------|
|                       |                   |                    |                |
|                       |                   |                    |                |
|                       |                   |                    |                |
|                       |                   |                    |                |
| <b>DSB Repair</b>     |                   |                    |                |
|                       |                   | <b>HR (95% CI)</b> | <b>P Value</b> |
| UVA                   |                   | 1.31 (1.16-1.47)   | 1.05E-05       |
| MVA                   |                   |                    |                |
| Pathway               |                   | 1.15 (1.02-1.30)   | 0.023          |
| Age                   |                   | 1.00 (0.98-1.02)   | 0.89           |
| PSA                   |                   |                    |                |
|                       | <10 (Low Risk)    | 1 [Reference]      |                |
|                       | 10-20 (Int. Risk) | 0.80 (0.55-1.15)   | 0.22           |
|                       | >20 (High Risk)   | 0.83 (0.57-1.19)   | 0.31           |
| <b>Gleason</b>        |                   |                    |                |
|                       | ≤6 (Low Risk)     | 1 [Reference]      |                |
|                       | 7 (Int. Risk)     | 2.48 (1.07-5.75)   | 0.035          |
|                       | 8-10 (High Risk)  | 6.86 (2.95-15.96)  | 7.73E-06       |
| SMS (+ vs. - margins) |                   | 1.03 (0.77-1.38)   | 0.83           |
| SVI                   |                   | 1.47 (1.06-2.04)   | 0.022          |
| ECE                   |                   | 1.13 (0.83-1.55)   | 0.42           |
| LNI                   |                   | 1.17 (0.80-1.70)   | 0.43           |
|                       |                   |                    |                |
|                       |                   |                    |                |
| <b>NHEJ</b>           |                   |                    |                |
|                       |                   | <b>HR (95% CI)</b> | <b>P Value</b> |
| UVA                   |                   | 1.24 (1.08-1.42)   | 1.79E-03       |
| MVA                   |                   |                    |                |
| Pathway               |                   | 1.12 (0.98-1.29)   | 0.095          |
| Age                   |                   | 1.00 (0.98-1.02)   | 0.90           |
| PSA                   |                   |                    |                |
|                       | <10 (Low Risk)    | 1 [Reference]      |                |
|                       | 10-20 (Int. Risk) | 0.78 (0.54-1.13)   | 0.19           |
|                       | >20 (High Risk)   | 0.81 (0.56-1.17)   | 0.26           |
| <b>Gleason</b>        |                   |                    |                |
|                       | ≤6 (Low Risk)     | 1 [Reference]      |                |
|                       | 7 (Int. Risk)     | 2.59 (1.12-5.99)   | 0.027          |
|                       | 8-10 (High Risk)  | 7.26 (3.13-16.83)  | 3.78E-06       |
| SMS (+ vs. -)         |                   | 1.03 (0.77-1.37)   | 0.87           |
| SVI                   |                   | 1.48 (1.07-2.06)   | 0.019          |
| ECE                   |                   | 1.13 (0.83-1.54)   | 0.43           |
| LNI                   |                   | 1.22 (0.84-1.77)   | 0.29           |
|                       |                   |                    |                |
|                       |                   |                    |                |
|                       |                   |                    |                |



|            |                   |                    |                |
|------------|-------------------|--------------------|----------------|
|            |                   |                    |                |
|            |                   |                    |                |
|            |                   |                    |                |
|            |                   |                    |                |
|            |                   |                    |                |
|            |                   |                    |                |
|            |                   |                    |                |
|            |                   |                    |                |
|            |                   |                    |                |
|            |                   |                    |                |
|            |                   |                    |                |
| <b>BER</b> |                   |                    |                |
|            |                   | <b>HR (95% CI)</b> | <b>P Value</b> |
| UVA        |                   | 1.11 (0.96-1.29)   | 1.58E-01       |
| MVA        |                   |                    |                |
|            | Pathway           | 0.98 (0.84-1.15)   | 0.82           |
|            | Age               | 1.00 (0.98-1.02)   | 0.93           |
|            | PSA               |                    |                |
|            | <10 (Low Risk)    | 1 [Reference]      |                |
|            | 10-20 (Int. Risk) | 0.79 (0.54-1.13)   | 0.20           |
|            | >20 (High Risk)   | 0.80 (0.56-1.16)   | 0.24           |
|            | Gleason           |                    |                |
|            | ≤6 (Low Risk)     | 1 [Reference]      |                |
|            | 7 (Int. Risk)     | 2.66 (1.15-6.17)   | 0.022          |
|            | 8-10 (High Risk)  | 7.61 (3.29-17.63)  | 2.18E-06       |
|            | SMS (+ vs. -)     | 1.03 (0.77-1.37)   | 0.86           |
|            | SVI               | 1.53 (1.10-2.12)   | 0.011          |
|            | ECE               | 1.13 (0.83-1.54)   | 0.44           |
|            | LNI               | 1.22 (0.84-1.77)   | 0.30           |

**eTable 6:** Multivariate Cox analysis of the DDR pathway signature in the training cohort

|     |                                           | BCR-free survival |          | Metastasis-free survival |          | Overall survival |            |
|-----|-------------------------------------------|-------------------|----------|--------------------------|----------|------------------|------------|
|     |                                           | HR (95% CI)       | P Value  | HR (95% CI)              | P Value  | HR (95% CI)      | P Value    |
| UVA |                                           | 1.43 (1.16-1.75)  | 7.73E-04 | 2.49 (1.90-3.26)         | 3.82E-11 | 1.92 (1.51-2.44) | 8.40E-08   |
| MVA |                                           |                   |          |                          |          |                  |            |
|     | DDR pathway signature (High vs. Low Risk) | 1.23 (0.98-1.53)  | 0.069    | 1.73 (1.30-2.31)         | 0.00017  | 1.44 (1.12-1.86) | 0.0048     |
|     | Age                                       | 1.00 (0.99-1.02)  | 0.67     | 1.00 (0.98-1.02)         | 0.86     | 1.04 (1.02-1.06) | 0.00066    |
|     | PSA                                       |                   |          |                          |          |                  |            |
|     | <10 (Low Risk)                            | 1 [Reference]     |          | 1 [Reference]            |          | 1 [Reference]    |            |
|     | 10-20 (Int. Risk)                         | 1.07 (0.82-1.40)  | 0.60     | 0.78 (0.54-1.13)         | 0.189    | 0.71 (0.52-0.98) | 0.038      |
|     | >20 (High Risk)                           | 1.40 (1.07-1.85)  | 0.015    | 0.83 (0.57-1.19)         | 0.30     | 0.66 (0.48-0.92) | 0.015      |
|     | Gleason                                   |                   |          |                          |          |                  |            |
|     | ≤6 (Low Risk)                             | 1 [Reference]     |          | 1 [Reference]            |          | 1 [Reference]    |            |
|     | 7 (Int. Risk)                             | 1.06 (0.73-1.55)  | 0.76     | 2.49 (1.07-5.76)         | 0.034    | 2.13 (1.18-3.83) | 0.012      |
|     | 8-10 (High Risk)                          | 1.99 (1.33-2.97)  | 0.00075  | 6.53 (2.80-15.20)        | 0.000014 | 4.68 (2.56-8.56) | 0.00000051 |
|     | SMS (+ vs. -)                             | 1.12 (0.90-1.39)  | 0.32     | 1.03 (0.78-1.38)         | 0.82     | 1.31 (1.01-1.69) | 0.039      |
|     | SVI                                       | 1.51 (1.18-1.94)  | 0.0012   | 1.45 (1.04-2.01)         | 0.028    | 1.61 (1.20-2.16) | 0.0016     |
|     | ECE                                       | 0.98 (0.78-1.23)  | 0.87     | 1.12 (0.83-1.53)         | 0.46     | 1.09 (0.83-1.42) | 0.55       |
|     | LNI                                       | 0.48 (0.34-0.66)  | 0.000013 | 1.11 (0.76-1.62)         | 0.57     | 1.29 (0.92-1.81) | 0.14       |

UVA=univariate. MVA=multivariate. DDR=DNA damage and repair. PSA=prostate specific antigen. SMS=surgical margin status. SVI=seminal vesicle invasion. ECE=extra-capsular extension. LNI=lymph node involvement.

**eTable 7:** C-indices from Cox proportional hazards models.

| <b>Cox model variable(s)</b> | <b>Cohort</b>     | <b>c-index</b> |
|------------------------------|-------------------|----------------|
| DDR pathway signature        | Training          | 0.61           |
|                              | Pooled validation | 0.60           |
| DDR pathway signature + CPV  | Training          | 0.72           |
|                              | Pooled validation | 0.71           |
| Age                          | Training          | 0.51           |
|                              | Pooled validation | 0.50           |
| PSA                          | Training          | 0.54           |
|                              | Pooled validation | 0.55           |
| Gleason                      | Training          | 0.65           |
|                              | Pooled validation | 0.58           |
| SMS                          | Training          | 0.54           |
|                              | Pooled validation | 0.56           |
| SVI                          | Training          | 0.59           |
|                              | Pooled validation | 0.54           |
| ECE                          | Training          | 0.58           |
|                              | Pooled validation | 0.47           |

DDR=DNA damage and repair. CPV=clinico-pathological variables. PSA=prostate specific antigen. SMS=surgical margin status. SVI=seminal vesicle invasion. ECE=extra-capsular extension.

|                  | <b>White</b> | <b>Black</b> | <b>Hispanic</b> | <b>Asian</b> | <b>Other</b> |
|------------------|--------------|--------------|-----------------|--------------|--------------|
| <b>Low Risk</b>  | 186          | 24           | 3               | 2            | 1            |
| <b>High Risk</b> | 90           | 7            | 0               | 0            | 0            |

**eTable 8: DDR signature risk group distribution by ethnicity. n=313.**

## Custom R scripts and files for DDR mutation analysis

### Contents of BroadCornellCell2013\_primary\_case\_ids.rds

```
[[1]]
[1] "PR-STID0000003127" "PR-STID0000002872" "PR-STID0000002682" "PR-STID0000000415" "PR-3042"      "PR-
2741"      "PR-2621"      "PR-2525"      "PR-09-601"
[10] "PR-09-3983"      "PR-09-146"      "PR-08-784"      "PR-08-556"      "PR-08-4154"      "PR-08-2455"      "PR-08-
2153"      "PR-07-4814"      "PR-07-4610"
[19] "PR-07-360"      "PR-07-3258"      "PR-06-3199"      "PR-06-1749"      "PR-05-3595"      "PR-0410"      "PR-04-
1243"      "PR-03-728"      "PR-03-3125"
[28] "PR-02-1431"      "P09-730"      "P09-628"      "P09-396"      "P09-37"      "P09-1042"      "P08-716"
"P08-688"      "P08-5852"
[37] "P08-501"      "P08-492"      "P08-217"      "P08-1541"      "P08-1042"      "P07-837"      "P07-5318"
"P07-5037"      "P07-5021"
[46] "P07-4941"      "P07-144"      "P05-620"      "P05-3852"      "P05-2709"      "P05-1657"      "P04-1084"
"P03-2345"      "P03-1426"
[55] "P01-28"
```

### Contents of MSKCC\_CancerCell2010\_primary\_case\_ids.rds:

```
[[1]]
[1] "PCA0181" "PCA0180" "PCA0179" "PCA0178" "PCA0177" "PCA0176" "PCA0175" "PCA0174" "PCA0173" "PCA0172"
"PCA0171" "PCA0170" "PCA0169" "PCA0168" "PCA0167" "PCA0166" "PCA0165" "PCA0164" "PCA0163"
[20] "PCA0162" "PCA0161" "PCA0160" "PCA0159" "PCA0158" "PCA0157" "PCA0156" "PCA0155" "PCA0154" "PCA0153"
"PCA0152" "PCA0151" "PCA0150" "PCA0149" "PCA0148" "PCA0147" "PCA0146" "PCA0145" "PCA0144"
[39] "PCA0143" "PCA0142" "PCA0141" "PCA0140" "PCA0139" "PCA0138" "PCA0137" "PCA0136" "PCA0135" "PCA0134"
"PCA0133" "PCA0132" "PCA0131" "PCA0130" "PCA0129" "PCA0128" "PCA0127" "PCA0126" "PCA0125"
[58] "PCA0124" "PCA0123" "PCA0122" "PCA0121" "PCA0120" "PCA0119" "PCA0118" "PCA0117" "PCA0116" "PCA0115"
"PCA0114" "PCA0113" "PCA0112" "PCA0111" "PCA0110" "PCA0109" "PCA0108" "PCA0107" "PCA0106"
[77] "PCA0105" "PCA0104" "PCA0103" "PCA0102" "PCA0101" "PCA0100" "PCA0099" "PCA0098" "PCA0097" "PCA0096"
"PCA0095" "PCA0094" "PCA0093" "PCA0092" "PCA0091" "PCA0090" "PCA0089" "PCA0088" "PCA0087"
[96] "PCA0086" "PCA0085" "PCA0084" "PCA0083" "PCA0082" "PCA0081" "PCA0080" "PCA0079" "PCA0078" "PCA0077"
"PCA0076" "PCA0075" "PCA0074" "PCA0073" "PCA0072" "PCA0071" "PCA0070" "PCA0069" "PCA0068"
[115] "PCA0066" "PCA0065" "PCA0064" "PCA0063" "PCA0062" "PCA0061" "PCA0060" "PCA0059" "PCA0058" "PCA0057"
"PCA0056" "PCA0055" "PCA0054" "PCA0053" "PCA0052" "PCA0050" "PCA0049" "PCA0048" "PCA0047"
[134] "PCA0046" "PCA0045" "PCA0044" "PCA0043" "PCA0042" "PCA0041" "PCA0040" "PCA0039" "PCA0038" "PCA0037"
"PCA0036" "PCA0035" "PCA0034" "PCA0033" "PCA0032" "PCA0031" "PCA0030" "PCA0029" "PCA0028"
[153] "PCA0027" "PCA0026" "PCA0025" "PCA0024" "PCA0023" "PCA0022" "PCA0021" "PCA0020" "PCA0019" "PCA0018"
"PCA0017" "PCA0016" "PCA0015" "PCA0014" "PCA0013" "PCA0012" "PCA0011" "PCA0010" "PCA0009"
[172] "PCA0008" "PCA0007" "PCA0006" "PCA0005" "PCA0004" "PCA0003" "PCA0002" "PCA0001"
```

### Contents of DDR\_GSEA\_genesets.gmt:



BASE\_EXCISION\_REPAIR [http://www.broadinstitute.org/gsea/msigdb/cards/BASE\\_EXCISION\\_REPAIR](http://www.broadinstitute.org/gsea/msigdb/cards/BASE_EXCISION_REPAIR) HMGB1P10  
 HMGB1 MSH6 HMGB2 MSH3 MSH2 POLG UNG TP53 SMUG1 MPG ERCC6 TDG OGG1 NTHL1  
 CCNO APEX1

DNA\_DAMAGE\_CHECKPOINT [http://www.broadinstitute.org/gsea/msigdb/cards/DNA\\_DAMAGE\\_CHECKPOINT](http://www.broadinstitute.org/gsea/msigdb/cards/DNA_DAMAGE_CHECKPOINT)  
 NBN ZAK HUS1 RINT1 PML RAD9A CHEK1 CHEK2 ATR BRSK1 NEK11 FOXN3 NAE1 RAD1  
 TRIAP1 PCBP4 GML CCNA2 ATRIP RAD17

DNA\_REPAIR [http://www.broadinstitute.org/gsea/msigdb/cards/DNA\\_REPAIR](http://www.broadinstitute.org/gsea/msigdb/cards/DNA_REPAIR) MMS19XRCC4 RAD51C  
 XRCC3 XRCC2 XRCC6 SETX IGHMBP2 MUTYH RAD21 CDKN2D PMS2 PMS1 CIB1 POLL  
 POLI POLH POLG LIG1 POLE LIG3 RAD9A LIG4 KAT5 RAD1 PNKP RFC3 RPAIN RAD17  
 HMGB1 RAD23B HMGB2 BLM MRE11A RAD23A HUS1 UBE2V1 UBE2V2 XAB2 POLE2  
 RAD51B POLQ NTHL1 ASF1A RECQL4 HMGB1P10 RECQL5 TREX2 BRCA2 ATR RAD54 LATM  
 BRCA1 VCP POLD1 TDG RAD54B PARP3 SMC1A ABL1 PARP1 NBN UVRAG MLH1  
 PMS2P1 FANCG CCNO FANCA FANCC UBE2A REV1 DDB1 GTF2H4 TP53 APTX PRKCG RAD52  
 UBE2B RAD50 XRCC6BP1 RAD51 GTF2H1 RBBP8 UBE2N RECQL XPC BTG2 GADD45G DDB2  
 RUVBL2 NHEJ1 GADD45A WRNIP1 UNG POLA1 SMUG1 RPA1 ERCC8 SUMO1 ERCC5 ERCC6  
 ERCC3 ERCC4 APEX1 FEN1 ERCC1 ERCC2 EXO1 MSH6 UPF1 MSH3 MSH2 MSH5 CEBPG TNP1  
 SOD1 TP73 ATRX MNAT1 MPG ATXN3 CSNK1D CSNK1E ALKBH1 OGG1

DOUBLE\_STRAND\_BREAK\_REPAIR  
[http://www.broadinstitute.org/gsea/msigdb/cards/DOUBLE\\_STRAND\\_BREAK\\_REPAIR](http://www.broadinstitute.org/gsea/msigdb/cards/DOUBLE_STRAND_BREAK_REPAIR) XRCC4 NBN  
 MRE11A XRCC6 POLA1 UBE2V2 LIG4 RAD52 SOD1 KAT5 BRCA1 RAD50 XRCC6BP1 RAD51  
 SETX UBE2N RAD21 VCP RAD54B NHEJ1 ERCC4 FEN1 CIB1

KEGG\_BASE\_EXCISION\_REPAIR [http://www.broadinstitute.org/gsea/msigdb/cards/KEGG\\_BASE\\_EXCISION\\_REPAIR](http://www.broadinstitute.org/gsea/msigdb/cards/KEGG_BASE_EXCISION_REPAIR)  
 NEIL2 MPG SMUG1 XRCC1 POLE4 HMGB1 POLE3 POLD4 MBD4 OGG1 UNG POLD3 PCNA NEIL1  
 POLE2 PARP4 PARP3 PARP2 POLB APEX1 POLL POLD1 POLD2 POLE NEIL3 TDG APEX2 LIG3  
 HMGB1P1 NTHL1 HMGB1P40 FEN1 LIG1 MUTYH PARP1

KEGG\_HOMOLOGOUS\_RECOMBINATION  
[http://www.broadinstitute.org/gsea/msigdb/cards/KEGG\\_HOMOLOGOUS\\_RECOMBINATION](http://www.broadinstitute.org/gsea/msigdb/cards/KEGG_HOMOLOGOUS_RECOMBINATION) RAD54L XRCC3  
 RAD51B NBN RAD52 RAD51D XRCC2 POLD4 BLM EME1 RPA1 RAD51 POLD3 RAD50  
 RPA3 RPA2 RPA4 RAD51C MRE11A BRCA2 POLD1 POLD2 MUS81 TOP3A RAD54B  
 SHFM1 TOP3B SSBP1

KEGG\_MISMATCH\_REPAIR [http://www.broadinstitute.org/gsea/msigdb/cards/KEGG\\_MISMATCH\\_REPAIR](http://www.broadinstitute.org/gsea/msigdb/cards/KEGG_MISMATCH_REPAIR) MLH3  
 POLD1 MLH1 POLD2 RFC1 MSH2 RFC3 RFC2 MSH3 POLD4 PMS2 RFC4 LIG1 RFC5 RPA1  
 MSH6 RPA3 POLD3 RPA2 PCNA SSBP1 RPA4 EXO1

KEGG\_NON\_HOMOLOGOUS\_END\_JOINING  
[http://www.broadinstitute.org/gsea/msigdb/cards/KEGG\\_NON\\_HOMOLOGOUS\\_END\\_JOINING](http://www.broadinstitute.org/gsea/msigdb/cards/KEGG_NON_HOMOLOGOUS_END_JOINING) XRCC4  
 MRE11A POLL POLM LOC731751 NHEJ1 LIG4 FEN1 DNNT XRCC5 RAD50 XRCC6 PRKDC  
 DCLRE1C

KEGG\_NUCLEOTIDE\_EXCISION\_REPAIR  
[http://www.broadinstitute.org/gsea/msigdb/cards/KEGG\\_NUCLEOTIDE\\_EXCISION\\_REPAIR](http://www.broadinstitute.org/gsea/msigdb/cards/KEGG_NUCLEOTIDE_EXCISION_REPAIR) MNAT1 POLE4  
 ERCC4 POLE3 ERCC3 ERCC6 ERCC5 GTF2H5 POLD4 ERCC2 RFC4 CETN2 RFC5 RPA1 RAD23B  
 RBX1 DDB2 RPA3 POLD3 RPA2 RAD23A PCNA RPA4 DDB1 POLE2 ERCC1 POLD1 POLD2  
 POLE RFC1 RFC3 RFC2 XPC XPA GTF2H2 GTF2H1 CDK7 LIG1 CUL4A CUL4B ERCC8 CCNH  
 GTF2H4 GTF2H3

NUCLEOTIDE\_EXCISION\_REPAIR [http://www.broadinstitute.org/gsea/msigdb/cards/NUCLEOTIDE\\_EXCISION\\_REPAIR](http://www.broadinstitute.org/gsea/msigdb/cards/NUCLEOTIDE_EXCISION_REPAIR)  
 POLL MMS19RAD23B DDB1 RAD23A TP53 BRCA2 LIG4 XAB2 ERCC8 ATXN3 ERCC5  
 ERCC6 XPC DDB2 ERCC3 NTHL1 ERCC4 ERCC1 ERCC2

REACTOME\_BASE\_EXCISION\_REPAIR  
[http://www.broadinstitute.org/gsea/msigdb/cards/REACTOME\\_BASE\\_EXCISION\\_REPAIR](http://www.broadinstitute.org/gsea/msigdb/cards/REACTOME_BASE_EXCISION_REPAIR) CCNO POLD3 FEN1  
 SMUG1 APEX1 LIG1 LIG3 MPG MUTYH NTHL1 OGG1 PCNA POLB POLD1 POLD2 POLD4 TDG  
 XRCC1 MBD4

REACTOME\_DNA\_REPAIR [http://www.broadinstitute.org/gsea/msigdb/cards/REACTOME\\_DNA\\_REPAIR](http://www.broadinstitute.org/gsea/msigdb/cards/REACTOME_DNA_REPAIR) RAD50  
 CDK7 CCNO MAD2L2 POLD3 ERCC8 ALKBH2 DDB1 DDB2 ERCC1 ERCC2 ERCC3 ERCC4 ERCC5  
 ERCC6 FANCA FANCC FANCD2 FANCE FANCB FANCF FANCG ALKBH3 FEN1 SMUG1 XRCC6 ZBTB32  
 UBE2T GTF2H1 GTF2H2 GTF2H3 GTF2H4 H2AFX APEX1 LOC389901 LIG1 LIG3 LIG4 MGMT MNAT1  
 MPG MRE11A MUTYH NBN ATM NTHL1 OGG1 PCNA REV1 POLB POLD1 POLD2 POLE  
 POLE2 POLH POLR2A POLR2B POLR2C POLR2D POLR2E POLR2F POLR2G POLR2HPOLR2I POLR2J POLR2K  
 POLR2L ATR FANCL TDP1 PRKDC XAB2 FANCM POLD4 RAD23B RAD51 RAD52 REV3L RFC2  
 RFC3 RFC4 RFC5 RPA1 RPA2 RPA3 RPS27A LOC648152 LOC651610 LOC651921  
 LOC652672 LOC652857 GTF2H2B BRCA1 BRCA2 TCEA1 TDG TP53BP1 RPS27AP11  
 UBA52 USP1 XPA XPC XRCC1 XRCC4 XRCC5 PALB2 C17orf70 BRIP1 MBD4 CCNH  
 C19orf40 MDC1

REACTOME\_DOUBLE\_STRAND\_BREAK\_REPAIR  
[http://www.broadinstitute.org/gsea/msigdb/cards/REACTOME\\_DOUBLE\\_STRAND\\_BREAK\\_REPAIR](http://www.broadinstitute.org/gsea/msigdb/cards/REACTOME_DOUBLE_STRAND_BREAK_REPAIR) RAD50  
 XRCC6 H2AFX LOC389901 LIG1 LIG4 MRE11A NBN ATM TDP1 PRKDC RAD51 RAD52  
 RPA1 RPA2 RPA3 LOC651610 BRCA1 BRCA2 TP53BP1 XRCC4 XRCC5 BRIP1 MDC1

REACTOME\_G2\_M\_DNA\_DAMAGE\_CHECKPOINT  
[http://www.broadinstitute.org/gsea/msigdb/cards/REACTOME\\_G2\\_M\\_DNA\\_DAMAGE\\_CHECKPOINT](http://www.broadinstitute.org/gsea/msigdb/cards/REACTOME_G2_M_DNA_DAMAGE_CHECKPOINT) CHEK1  
 CHEK2 ATM ATR LOC648152 LOC651610 LOC651921 WEE1 ATRIP CCNB1 CDK1 CDC25C

REACTOME\_HOMOLOGOUS\_RECOMBINATION\_REPAIR\_OF\_REPLICATION\_INDEPENDENT\_DOUBLE\_STRAND\_BREAKS  
[http://www.broadinstitute.org/gsea/msigdb/cards/REACTOME\\_HOMOLOGOUS\\_RECOMBINATION\\_REPAIR\\_OF\\_REPLICATION\\_INDEPENDENT\\_DOUBLE\\_STRAND\\_BREAKS](http://www.broadinstitute.org/gsea/msigdb/cards/REACTOME_HOMOLOGOUS_RECOMBINATION_REPAIR_OF_REPLICATION_INDEPENDENT_DOUBLE_STRAND_BREAKS)  
 RAD50 H2AFX LIG1 MRE11A NBN ATM  
 RAD51 RAD52 RPA1 RPA2 RPA3 LOC651610 BRCA1 BRCA2 TP53BP1 BRIP1 MDC1

REACTOME\_NUCLEOTIDE\_EXCISION\_REPAIR  
[http://www.broadinstitute.org/gsea/msigdb/cards/REACTOME\\_NUCLEOTIDE\\_EXCISION\\_REPAIR](http://www.broadinstitute.org/gsea/msigdb/cards/REACTOME_NUCLEOTIDE_EXCISION_REPAIR) CDK7 POLD3  
 ERCC8 DDB1 DDB2 ERCC1 ERCC2 ERCC3 ERCC4 ERCC5 ERCC6 GTF2H1 GTF2H2 GTF2H3 GTF2H4 LIG1  
 MNAT1 PCNA POLD1 POLD2 POLE POLE2 POLR2A POLR2B POLR2C POLR2D POLR2E POLR2F POLR2G  
 POLR2HPOLR2I POLR2J POLR2K POLR2L XAB2 POLD4 RAD23B RFC2 RFC3 RFC4 RFC5 RPA1  
 RPA2 RPA3 LOC652672 LOC652857 GTF2H2B TCEA1 XPA XPC CCNH

REACTOME\_P53\_INDEPENDENT\_G1\_S\_DNA\_DAMAGE\_CHECKPOINT  
[http://www.broadinstitute.org/gsea/msigdb/cards/REACTOME\\_P53\\_INDEPENDENT\\_G1\\_S\\_DNA\\_DAMAGE\\_CHECKPOINT](http://www.broadinstitute.org/gsea/msigdb/cards/REACTOME_P53_INDEPENDENT_G1_S_DNA_DAMAGE_CHECKPOINT)  
 PSMD14 CHEK1 CHEK2 PSMA8 PSME4 ATM PSMA1 PSMA2 PSMA3 PSMA4 PSMA5 PSMA6  
 PSMA7 PSMB1 PSMB2 PSMB3 PSMB4 PSMB5 PSMB6 PSMB7 PSMB8 PSMB9 PSMB10 PSMC1 PSMC2  
 PSMC3 PSMC4 PSMC5 PSMC6 PSMD1 PSMD2 PSMD3 PSMD4 PSMD5 PSMD7 PSMD8 PSMD9 PSMD10  
 PSMD11 PSMD12 PSMD13 PSME1 PSME2 RPS27A LOC651610 LOC652826  
 RPS27AP11 UBA52 PSMF1 PSMD6 CDC25A

## Custom R script for mutation analysis:

```
library(cgdsr)

date <- "06052015"

mycgds = CGDS("http://www.cbioportal.org/public-portal/")

#create data object for gene sets
file_conn <- file("DDR_GSEA_genesets.gmt")
DDR_GSEA_genesets <- strsplit(readLines(file_conn), "\t")
close(file_conn)
names(DDR_GSEA_genesets) <- sapply(DDR_GSEA_genesets, function(x) x[1])
DDR_GSEA_genesets <- lapply(DDR_GSEA_genesets, function(x) x[-c(1:2)])

#create CancerStudy list
study_list <- list("prad_broad", "prad_tcga", "prad_tcga_pub",
                  "prad_broad_2013", "prad_mskcc")

#create overall case_id list
get_seq_case_list <- function (cancer_study) {
  seq_case_list_row <-
    getCaseLists(mycgds, cancer_study)[ , 2] == "Sequenced Tumors" |
    getCaseLists(mycgds, cancer_study)[ , 2] == "Sequenced Samples"
  initial_list <- unlist(strsplit(getCaseLists(mycgds, cancer_study)[
    seq_case_list_row, "case_ids"], split=" "))
  if (cancer_study == "prad_broad_2013") {
    return(initial_list[initial_list %in%
      unlist(readRDS("BroadCornellCell2013_primary_case_ids.rds"))])
  } else if (cancer_study == "prad_mskcc") {
    return(initial_list[initial_list %in%
      unlist(readRDS("MSKCC_CancerCell2010_primary_case_ids.rds"))])
  }
  else return(initial_list)
}

overall_case_id_list <- unique(unlist(lapply(study_list, get_seq_case_list)))

#generate list of genetic profiles and case lists
get_seq_info <- function (cancer_study) {
  mut_profile_list_row <-
    getGeneticProfiles(mycgds, cancer_study)[ , 2] == "Mutations"
  seq_case_list_row <-
    getCaseLists(mycgds, cancer_study)[ , 2] == "Sequenced Tumors" |
    getCaseLists(mycgds, cancer_study)[ , 2] == "Sequenced Samples"
}
```

© 2015 American Medical Association. All rights reserved.

```

        return(c(case_list=getCaseLists(mycgds, cancer_study)[seq_case_list_row, 1],
                profile=getGeneticProfiles(mycgds, cancer_study)[mut_profile_list_row, 1]))
    }
seq_info <- lapply(study_list, get_seq_info)
names(seq_info) <- unlist(study_list)

get_sample_alteration <- function(get_mut_vector) {
  tryCatch({
    mut_data <- getMutationData(mycgds, get_mut_vector[1], get_mut_vector[2],
                                get_mut_vector[3])[ , c("case_id", "amino_acid_change")]
    data.frame(row.names=row.names(mut_data),
              Sample=mut_data$case_id,
              Gene=rep(gene, nrow(mut_data)),
              Alteration=mut_data$amino_acid_change)
  },
  error = function (err){
    #print(err)
    print(get_mut_vector)
    return(NULL)}
  )
}

oncoprint_list_to_mutation_call_matrix <- function(op_list) {

  genes <- unique(op_list$Gene[op_list$Gene != ""])
  mut_matrix <- matrix(
    rep(0, length(unique(op_list$Sample)) * length(genes)),
    nrow=length(unique(op_list$Sample)), ncol=length(genes),
    dimnames=list(unique(op_list$Sample), genes)
  )
  mut_calls_df <- op_list[op_list$Alteration != "", ]
  for(i in 1:nrow(mut_calls_df)) {
    mut_matrix[mut_calls_df[i, "Sample"], mut_calls_df[i, "Gene"]] <- 1
  }
  return(mut_matrix)
}

overall_mut_percentage_df <- data.frame()
mut_pct_list <- list()

#iterate over gene sets to produce mutation matrix
for(i in 1:length(DDR_GSEA_genesets)) {

  gene_set <- DDR_GSEA_genesets[[i]]
  gene_set_name <- names(DDR_GSEA_genesets)[i]
}

```

© 2015 American Medical Association. All rights reserved.

```

oncoprint_list <- data.frame()

#iterate over genes in gene set
for (gene in gene_set) {
  #check mutations in Broad/Cornell Nat Gen 2012 – all cases (112), and collect case_ids
  oncoprint_list <- rbind(oncoprint_list,
    get_sample_alteration(c(seq_info[[1]], gene)))
  #check mutations in TCGA in prep – all cases, and collect case_ids
  oncoprint_list <- rbind(oncoprint_list,
    get_sample_alteration(c(seq_info[[2]], gene)))
  #check mutations in TCGA provisional – all cases, and collect case_ids
  oncoprint_list <- rbind(oncoprint_list,
    get_sample_alteration(c(seq_info[[3]], gene)))
  #check mutations in Broad/Cornell Cell 2013, narrow to primary cases (55) and collect case_ids
  temp_oncoprint_list <- get_sample_alteration(c(seq_info[[4]], gene))
  if(!is.null(temp_oncoprint_list)) {
    temp_oncoprint_list <- temp_oncoprint_list[
      rownames(temp_oncoprint_list) %in%
      unlist(readRDS("BroadCornellCell2013_primary_case_ids.rds")), ]
    oncoprint_list <- rbind(oncoprint_list, temp_oncoprint_list)
  }
  #check mutations in MSKCC Cancer Cell 2010, narrow to primary cases (157 cases), and collect case_ids
  temp_oncoprint_list <- get_sample_alteration(c(seq_info[[5]], gene))
  if(!is.null(temp_oncoprint_list)) {
    temp_oncoprint_list <- temp_oncoprint_list[
      rownames(temp_oncoprint_list) %in%
      unlist(readRDS("BroadCornellCell2013_primary_case_ids.rds")), ]
    oncoprint_list <- rbind(oncoprint_list, temp_oncoprint_list)
  }
} #end gene iteration

#collect number of cases mutated for at least 1 gene in this gene set
num_mut_cases <- length(unique(oncoprint_list$Sample))

#collect non-mutated cases and genes
no_mut_case_ids <- overall_case_id_list[!overall_case_id_list %in%
  oncoprint_list$Sample]
no_mut_genes <- gene_set[!gene_set %in% oncoprint_list$Gene]
no_mut_Gene_column <- c(no_mut_genes, rep("",
  length(no_mut_case_ids) - length(no_mut_genes))
)

#build list of non-mutated cases and genes
no_mut_df <- data.frame(Sample=no_mut_case_ids,Gene=no_mut_Gene_column,

```

```

        Alteration=rep("", length(no_mut_case_ids))
    )

#add non-mutated cases and genes to oncoprint_list
oncoprint_list <- rbind(oncoprint_list, no_mut_df)

#write to file
filename <- paste(paste(gene_set_name, "oncoprint", date,
                        sep="_"), ".txt", sep="")
write.table(oncoprint_list, file=filename, sep="\t", row.names=F,
            col.names=T, quote=F)

#generate mutation call matrix and write to file
mut_call_matrix <- oncoprint_list_to_mutation_call_matrix(oncoprint_list)
filename <- paste(paste(gene_set_name, "mutation_call_matrix", date,
                        sep="_"), ".txt", sep="")
write.table(mut_call_matrix, file=filename, sep="\t", row.names=T,
            col.names=T, quote=F)

#tabulate mutation percentages by gene for each geneset
mut_pct_list[[i]] <- apply(mut_call_matrix, 2, function(x)
    100 * (sum(x) / length(x))
)
names(mut_pct_list)[i] <- names(DDR_GSEA_genesets)[i]

#tabulate overall mutation information
num_nonmut_cases <- length(unique(no_mut_case_ids))
percentage_mut_cases <- 100 * (num_mut_cases/(num_mut_cases +
    num_nonmut_cases))
overall_mut_percentage_df <- rbind(
    overall_mut_percentage_df,
    data.frame(Gene_Set=gene_set_name,
              Num_mut=num_mut_cases,
              Num_nonmut=num_nonmut_cases,
              Mut_pct=percentage_mut_cases
    )
)
} # end gene set iteration

filename <- paste("DDR_genesets_overall_mutation_info_", date, ".txt",
                sep="")
write.table(overall_mut_percentage_df, file=filename, row.names=F,
            col.names=T, quote=F)

```

© 2015 American Medical Association. All rights reserved.

```
filename <- paste("DDR_genesets_individual_gene_mut_pct_", date, ".txt",  
  sep="")  
sink(file=filename)  
print(mut_pct_list)  
sink()
```
